# Supplementary material
Source: PubMed Central journal article supplement (PMC8597418)

## Synthesis and Antitumour Evaluation of Indole-2-Carboxamides against Paediatric Brain Cancer Cells

Shahinda S. R. Alsayed<sup>a</sup>, Amreena Suri<sup>b</sup>, Anders W. Bailey<sup>b</sup>, Samuel Lane<sup>c</sup>,  
Eryn L Werry<sup>c,d</sup>, Chiang-Ching Huang<sup>e</sup>, Li-Fang Yu<sup>f</sup>, Michael Kassiou<sup>c, \*</sup>,  
Simone Treiger Sredni<sup>b,g, \*</sup>, and Hendra Gunosewoyo<sup>a, \*</sup>

<sup>a</sup> Curtin Medical School, Faculty of Health Sciences, Curtin University, Bentley, Perth, WA 6102, Australia

<sup>b</sup> Division of Pediatric Neurosurgery, Ann and Robert H. Lurie Children's Hospital of Chicago, Chicago, IL 60611, USA

<sup>c</sup> School of Chemistry, The University of Sydney, NSW, 2006, Australia

<sup>d</sup> Faculty of Medicine and Health, The University of Sydney, NSW 2006, Australia

<sup>e</sup> Department of Biostatistics, Zilber School of Public Health, University of Wisconsin, Milwaukee, WI 53205, USA

<sup>f</sup> Shanghai Engineering Research Center of Molecular Therapeutics and New Drug Development, School of Chemistry and Molecular Engineering, East China Normal University, 3663 North Zhongshan Road, Shanghai 200062, China

<sup>g</sup> Department of Surgery, Northwestern University, Feinberg School of Medicine, Chicago, IL 60611, USA

---

\* Corresponding author. Michael Kassiou: [michael.kassiou@sydney.edu.au](mailto:michael.kassiou@sydney.edu.au)

\* Corresponding author. Simone Treiger Sredni: [simone.sredni@gmail.com](mailto:simone.sredni@gmail.com)

\* Corresponding author. Hendra Gunosewoyo: [Hendra.Gunosewoyo@curtin.edu.au](mailto:Hendra.Gunosewoyo@curtin.edu.au)

**Table S1. Downregulated genes in 8a-treated KNS42 cells**

| Gene Symbol          | Description <sup>a</sup>                                            | Fold Change | P value   | Function <sup>a</sup>                                                                                                                                                                     |
|----------------------|---------------------------------------------------------------------|-------------|-----------|-------------------------------------------------------------------------------------------------------------------------------------------------------------------------------------------|
| <b>PLAC1</b>         | Placenta specific protein1                                          | 30          | 0.0028    | Placental development                                                                                                                                                                     |
| CLECL1               | C-type lectin-like domain family 1                                  | 19          | 0.0123    | Immune response regulation                                                                                                                                                                |
| ETV7                 | ETS Variant Transcription Factor 7                                  | 19          | 0.0057    | Transcriptional repressor                                                                                                                                                                 |
| TNS1                 | Tensin-1                                                            | 18          | 0.0100    | Fibrillar adhesion and crosslinking actin filaments                                                                                                                                       |
| KCNJ12               | ATP-sensitive inward rectifier potassium channel 12                 | 17          | 0.0060    | Potassium ion transfer                                                                                                                                                                    |
| NT5C1B               | Cytosolic 5'-nucleotidase 1B                                        | 14          | 0.0124    | Adenosine level regulation                                                                                                                                                                |
| TREH                 | Trehalase                                                           | 13          | 0.0154    | Trehalose hydrolysis                                                                                                                                                                      |
| FAM186A              | Family with sequence similarity 186, member A                       | 13          | 0.0286    | ND <sup>b</sup>                                                                                                                                                                           |
| LOC105377622         | A non-coding RNA (ncRNA) gene                                       | 13          | 0.0221    | ND <sup>b</sup>                                                                                                                                                                           |
| OPCML                | Opioid-binding protein/cell adhesion molecule-like                  | 13          | 0.0204    | Cell contact regulation                                                                                                                                                                   |
| DNASE2B              | Deoxyribonuclease-2-beta                                            | 13          | 0.0254    | DNA degradation                                                                                                                                                                           |
| <b>ARHGAP9</b>       | Rho GTPase-activating protein 9                                     | 12          | 1.23E-12  | Cytoskeletal dynamics regulation <sup>1</sup>                                                                                                                                             |
| <b>APELA</b>         | Apelin receptor early endogenous ligand                             | 11          | 0.0159    | Cardiovascular homeostasis                                                                                                                                                                |
| MISP                 | Mitotic interactor and substrate of PLK1                            | 10          | 0.0181    | Cell division and migration                                                                                                                                                               |
| JSRP1                | Junctional sarcoplasmic reticulum protein 1                         | 10          | 0.0215    | Modulation of Skeletal muscle excitation-contraction coupling                                                                                                                             |
| CCDC42               | Coiled-coil domain-containing protein 42                            | 10          | 0.0104    | Sperm development                                                                                                                                                                         |
| KNCN                 | Kinocilin                                                           | 10          | 0.0374    | Vacuolar trafficking                                                                                                                                                                      |
| FLG                  | Filaggrin                                                           | 9           | 3.05E-88  | Keratinisation                                                                                                                                                                            |
| ADM2                 | Adrenomedullin 2                                                    | 8           | 1.08E-47  | Gastrointestinal and cardiovascular homeostasis                                                                                                                                           |
| CHAC1                | Glutathione-specific gamma-glutamylcyclotransferase 1               | 8           | 2.69E-76  | neuronal differentiation and Glutathione level Modulation                                                                                                                                 |
| IRX3                 | Iroquois Homeobox 3                                                 | 7           | 0.0329    | Neural development                                                                                                                                                                        |
| GPR45                | G Protein-Coupled Receptor 45                                       | 7           | 0.0306    | Mediation of Signalling processes                                                                                                                                                         |
| <b>NDUFA4L2</b>      | NADH dehydrogenase [ubiquinone] 1 alpha subcomplex subunit 4-like 2 | 7           | 0.0002    | Cell survival regulation <sup>2</sup>                                                                                                                                                     |
| TESC                 | Tescalcin or Calcineurin B homologous protein 3                     | 6           | 0.0009    | Cell pH regulation                                                                                                                                                                        |
| <b>MAPK4</b>         | Mitogen-Activated Protein Kinase 4                                  | 6           | 0.0001    | Phosphorylation of microtubule-associated protein 2 (MAP2) <sup>3</sup>                                                                                                                   |
| SH2D3C               | SH2 domain-containing protein 3C                                    | 6           | 0.0237    | Mediation of cell signalling pathways implicated in cell adhesion, migration, and invasion                                                                                                |
| CABP1                | Calcium-binding protein 1                                           | 5           | 0.0254    | Signal transduction                                                                                                                                                                       |
| <b>SLC7A5 (LAT1)</b> | Large neutral amino acids transporter small subunit 1               | 5           | 5.30E-217 | Amino acid exchanger                                                                                                                                                                      |
| <b>ANGPTL4</b>       | Angiopoietin-related protein 4                                      | 5           | 0.0106    | Regulation of insulin sensitivity, glucose homeostasis, and lipid metabolism                                                                                                              |
| MIOX                 | Myo-Inositol Oxygenase                                              | 5           | 4.55E-08  | ND <sup>b</sup>                                                                                                                                                                           |
| PLIN5                | Perilipin-5                                                         | 5           | 0.0017    | Maintaining the balance between lipolysis and lipogenesis.                                                                                                                                |
| ACTN3                | Actinin Alpha 3                                                     | 5           | 0.0221    | Crosslinking actin with various intracellular structures (a bundling protein)                                                                                                             |
| CCKAR                | Cholecystokinin receptor type A                                     | 5           | 0.0346    | Mediator of smooth muscle contraction of stomach and gallbladder, as well as pancreatic enzyme secretion and growth. Regulation of satiety and release of dopamine and $\beta$ -endorphin |

<sup>a</sup> All descriptions and functions were retrieved from uniprot (<https://www.uniprot.org/>) and/or genecards (<https://www.genecards.org/>) websites. In addition, other relevant references are interspersed therein. <sup>b</sup> ND: not determined.

## References:

1. C. Han, S. He, R. Wang, X. Gao, H. Wang, J. Qiao, X. Meng, Y. Li and L. Yu, *J. Transl. Med.*, 2021, **19**, 65.
2. L. Meng, X. Yang, X. Xie and M. Wang, *Thorac. Cancer*, 2019, **10**, 676-685.
3. C. Sanchez, J. Diaz-Nido and J. Avila, *Prog. Neurobiol.*, 2000, **61**, 133-168.

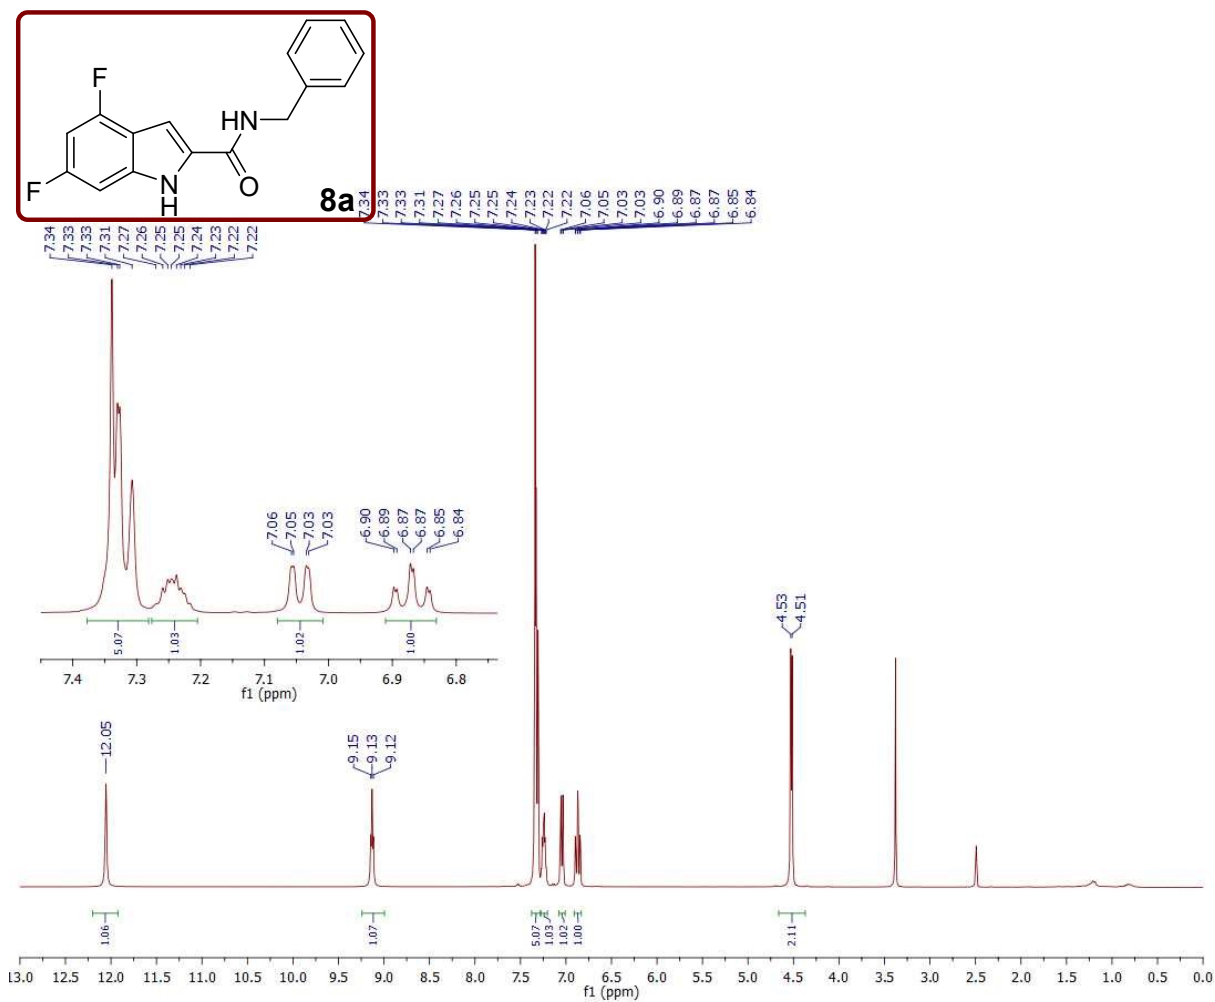

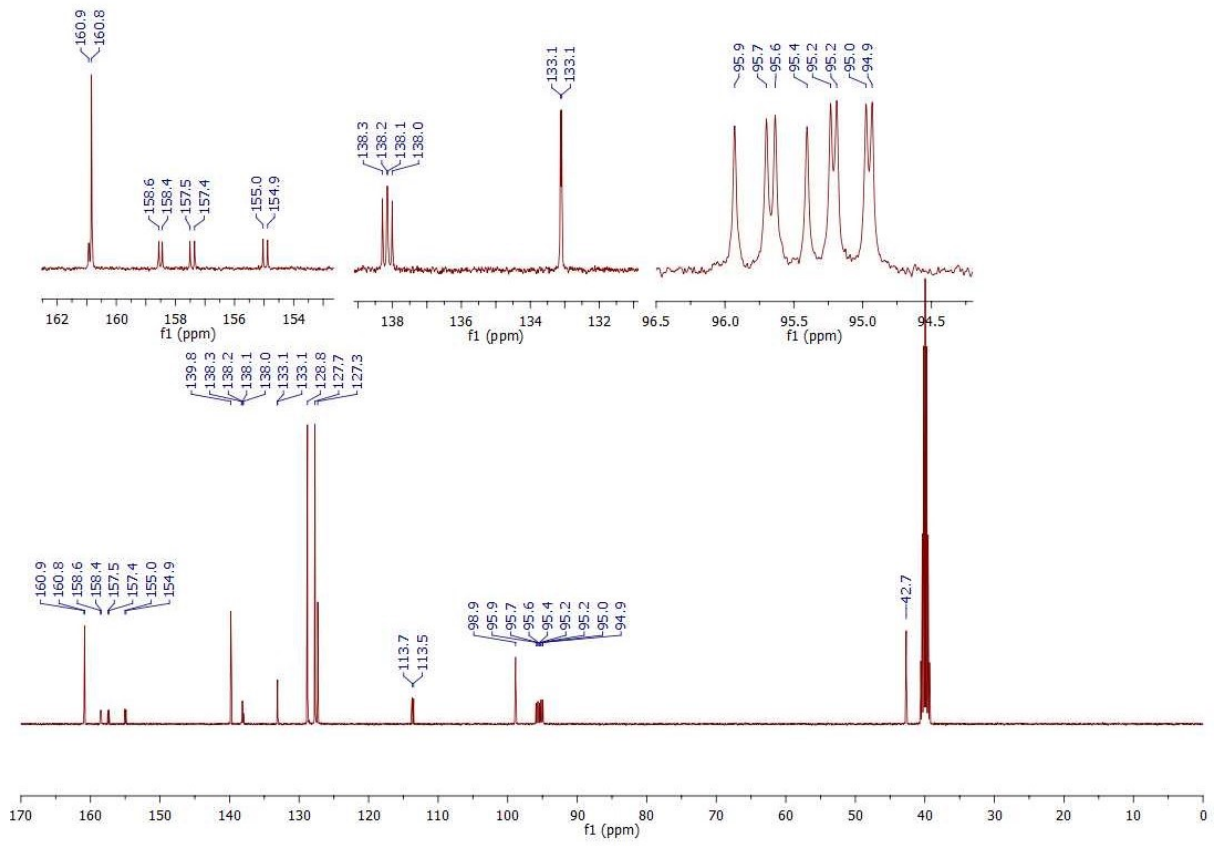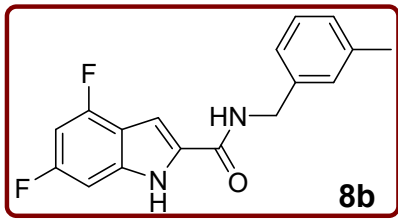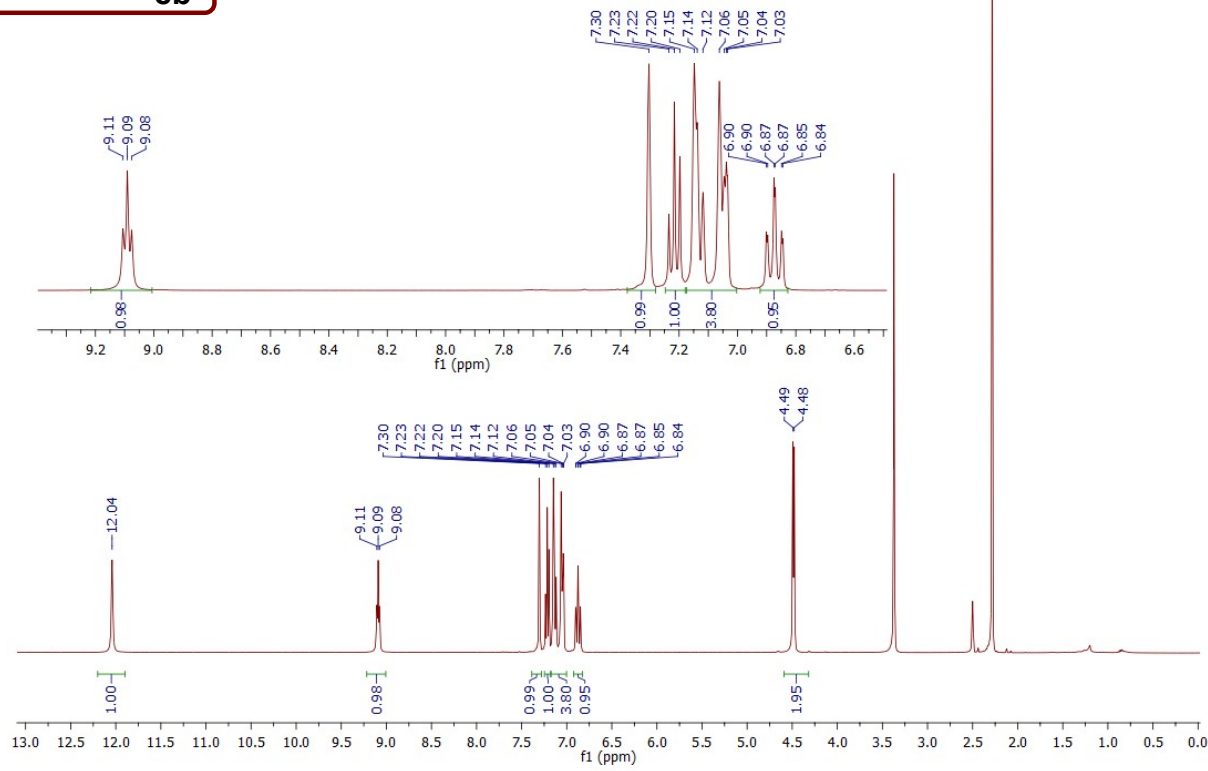

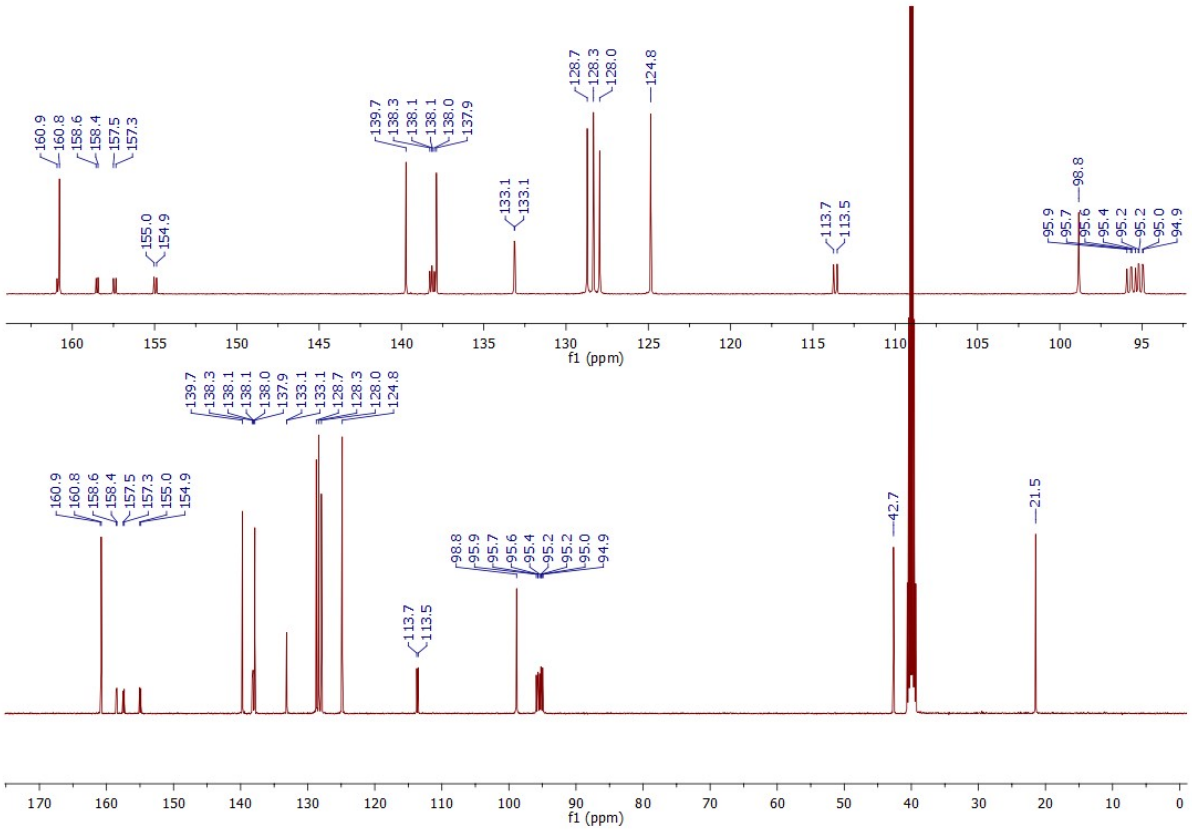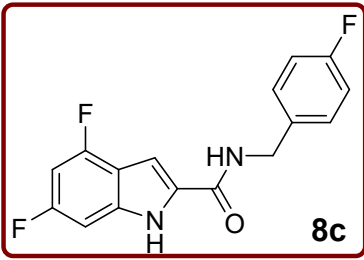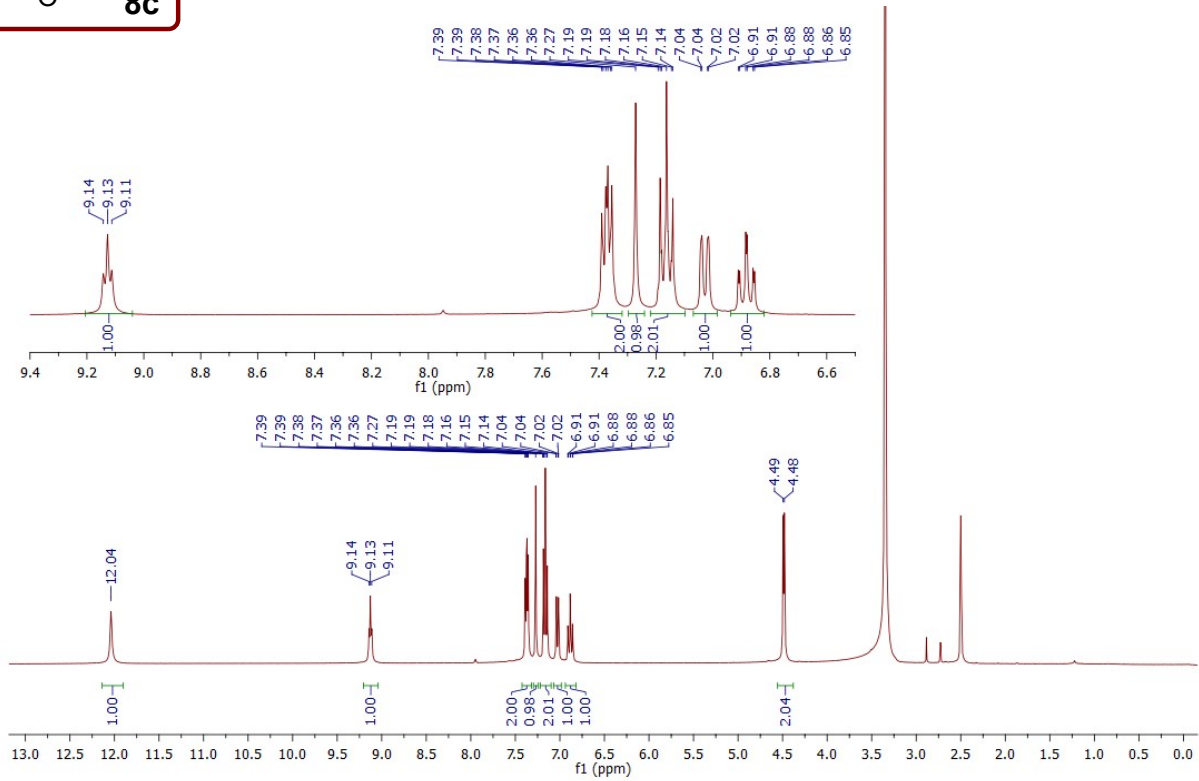

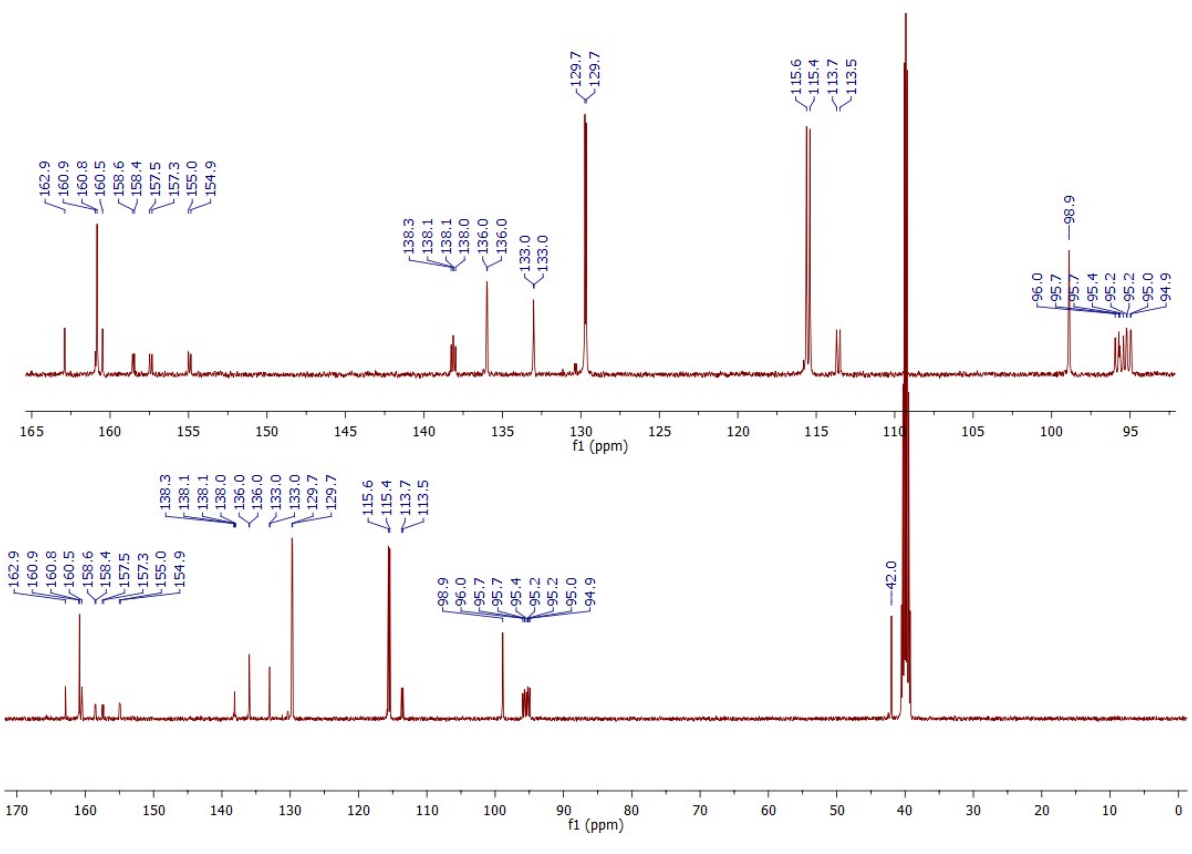

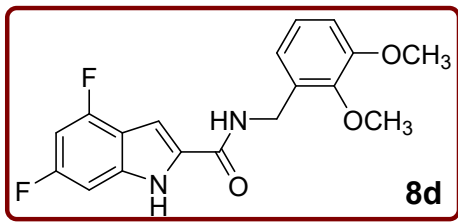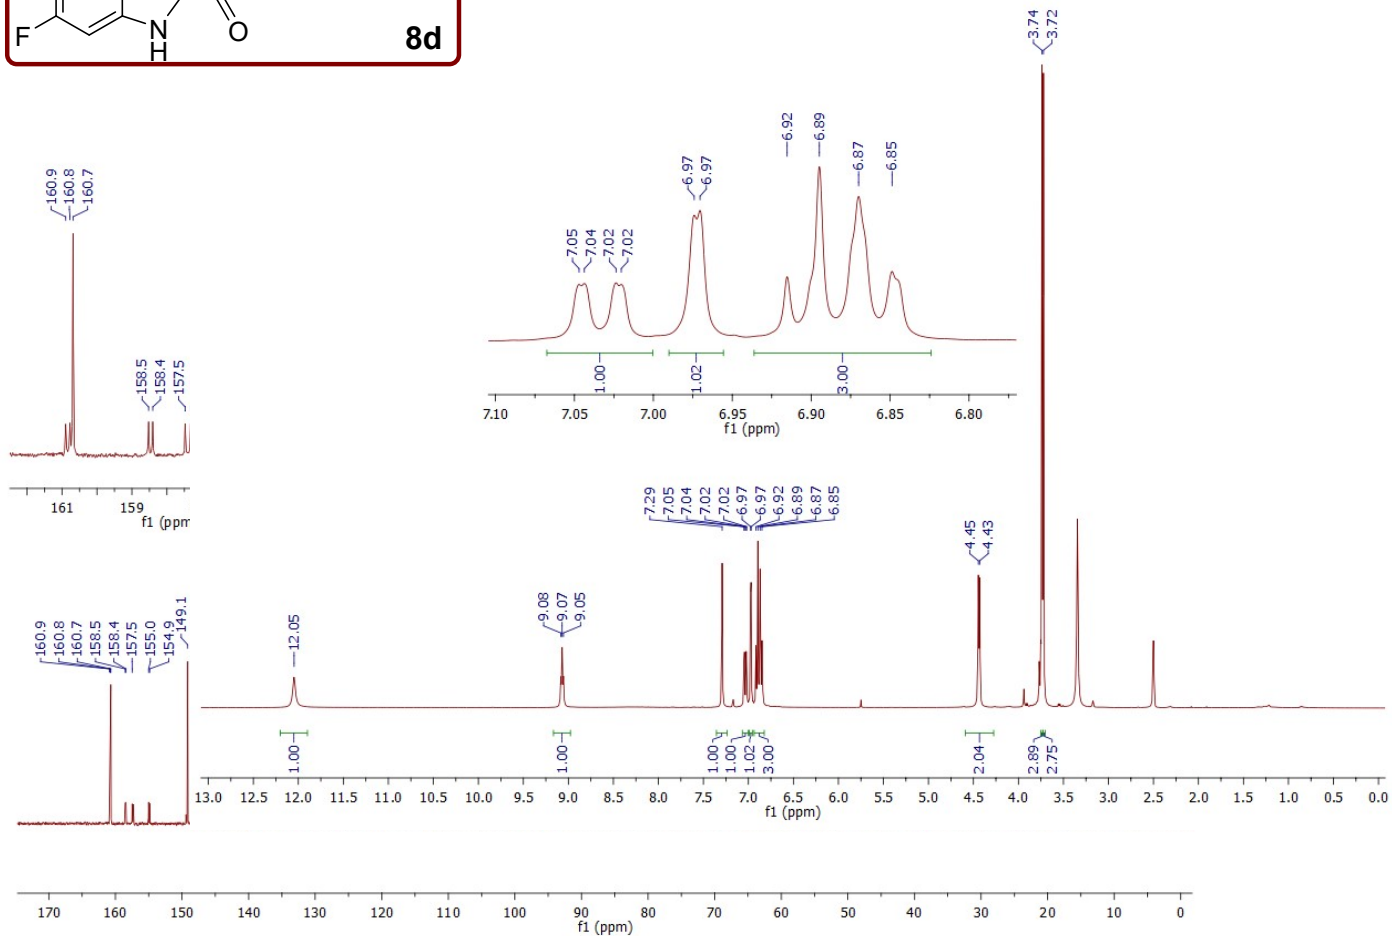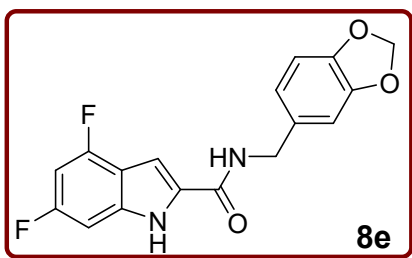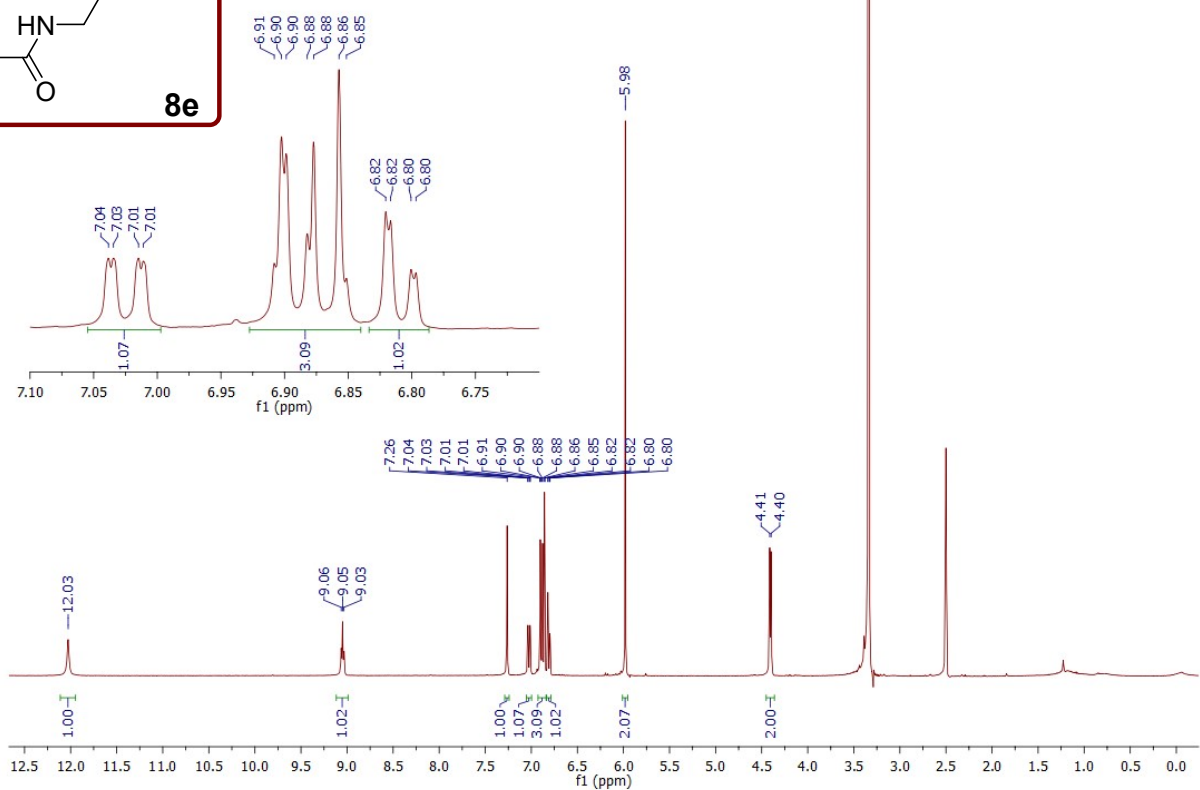

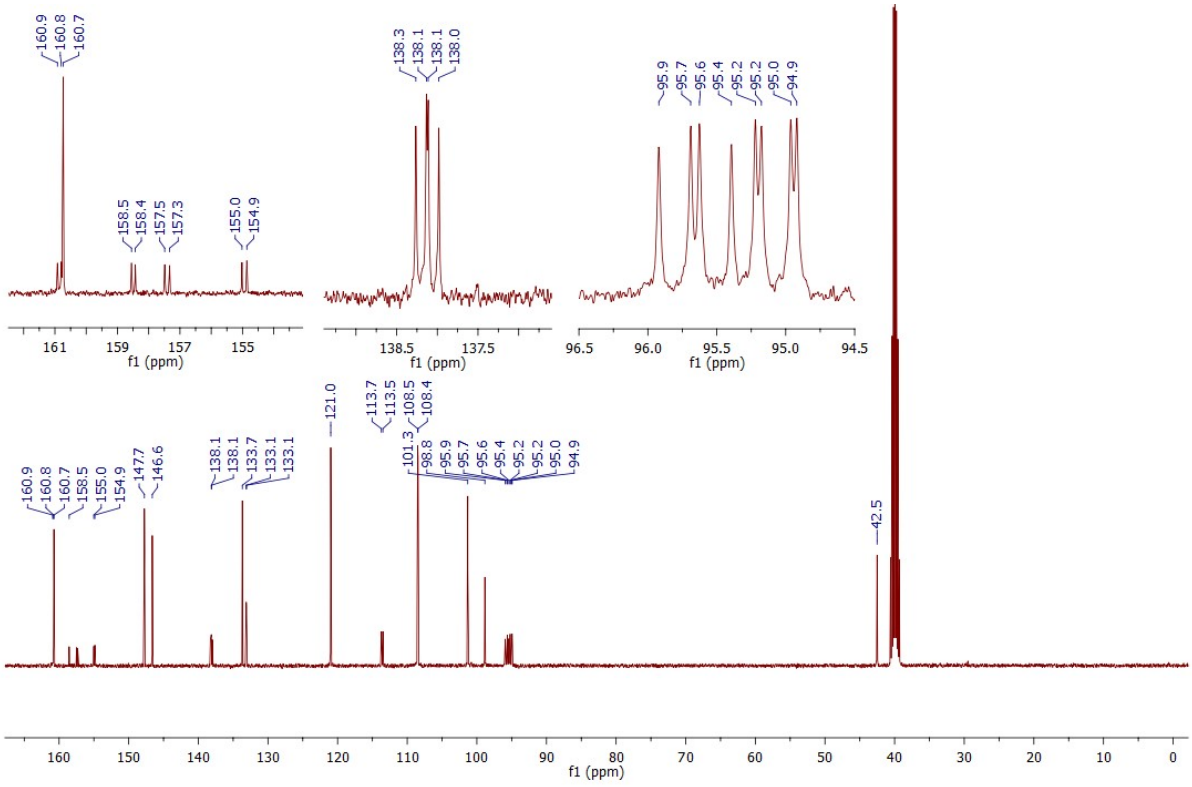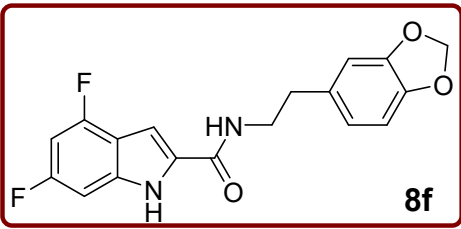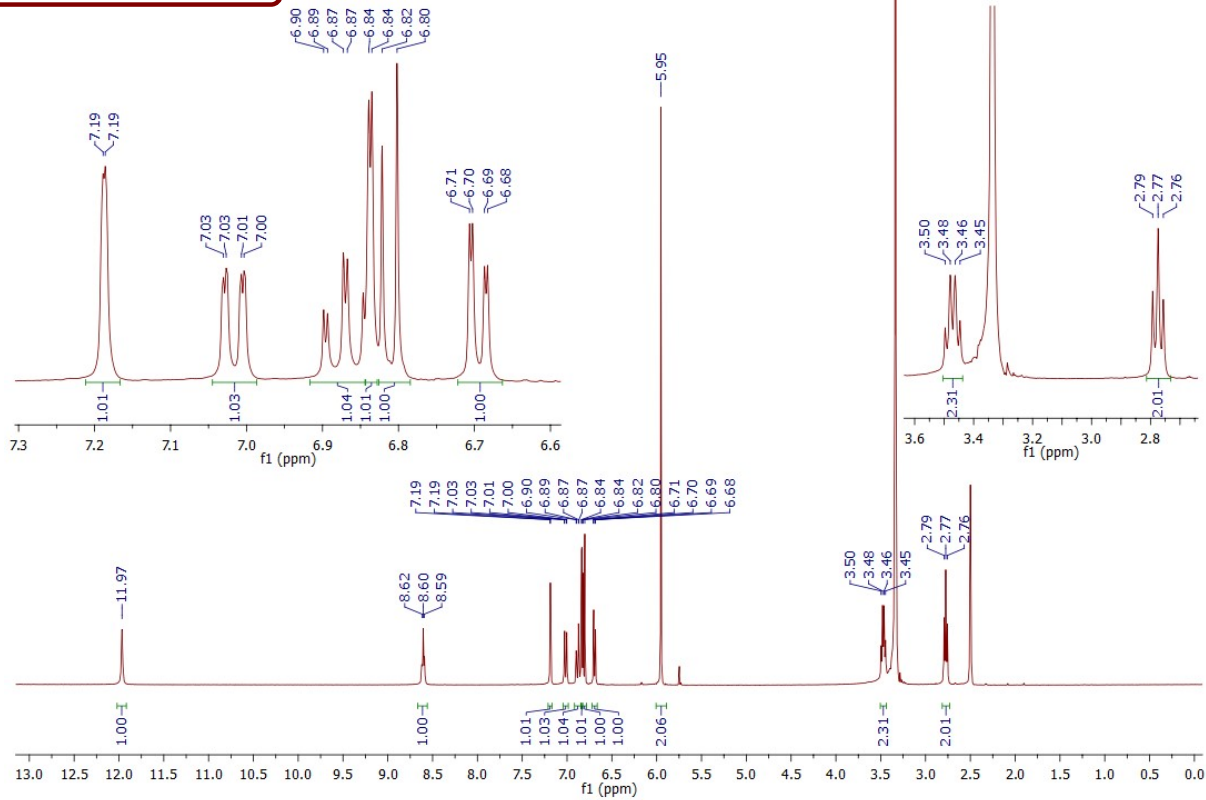



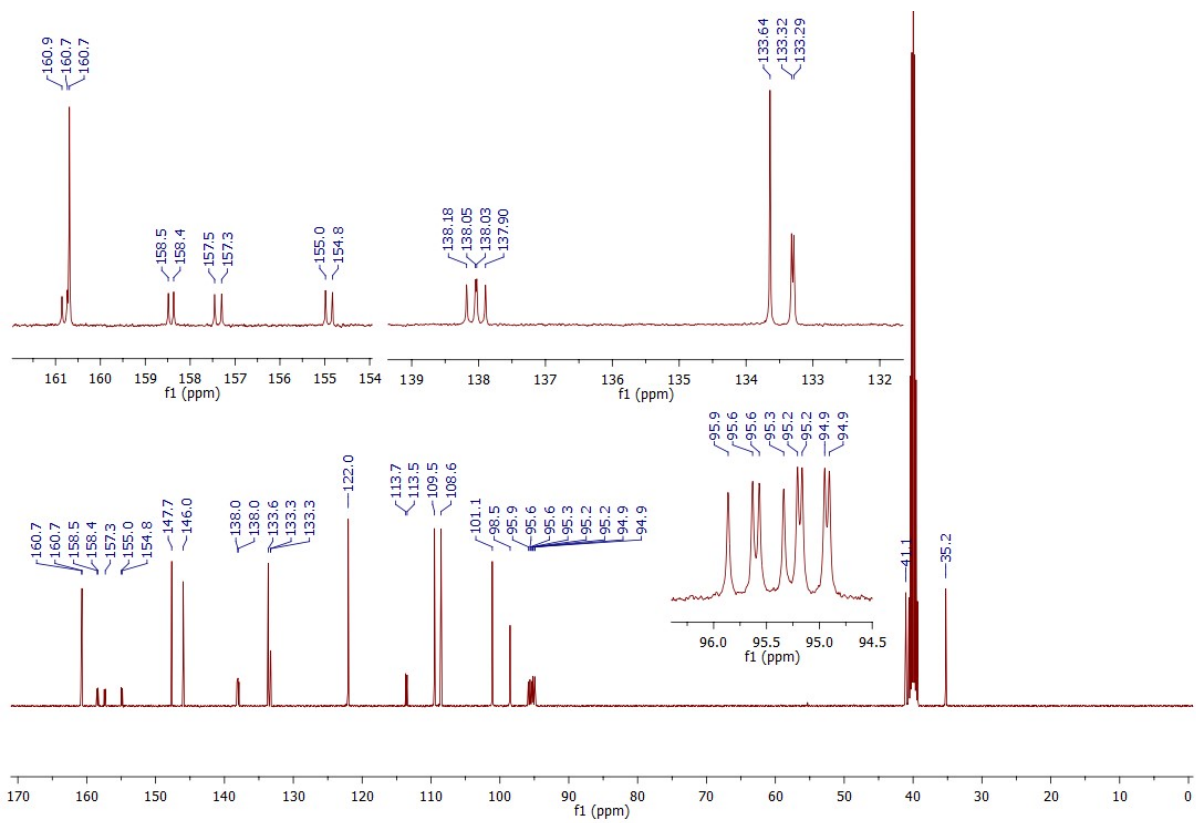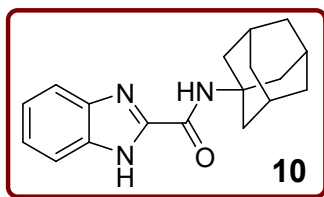

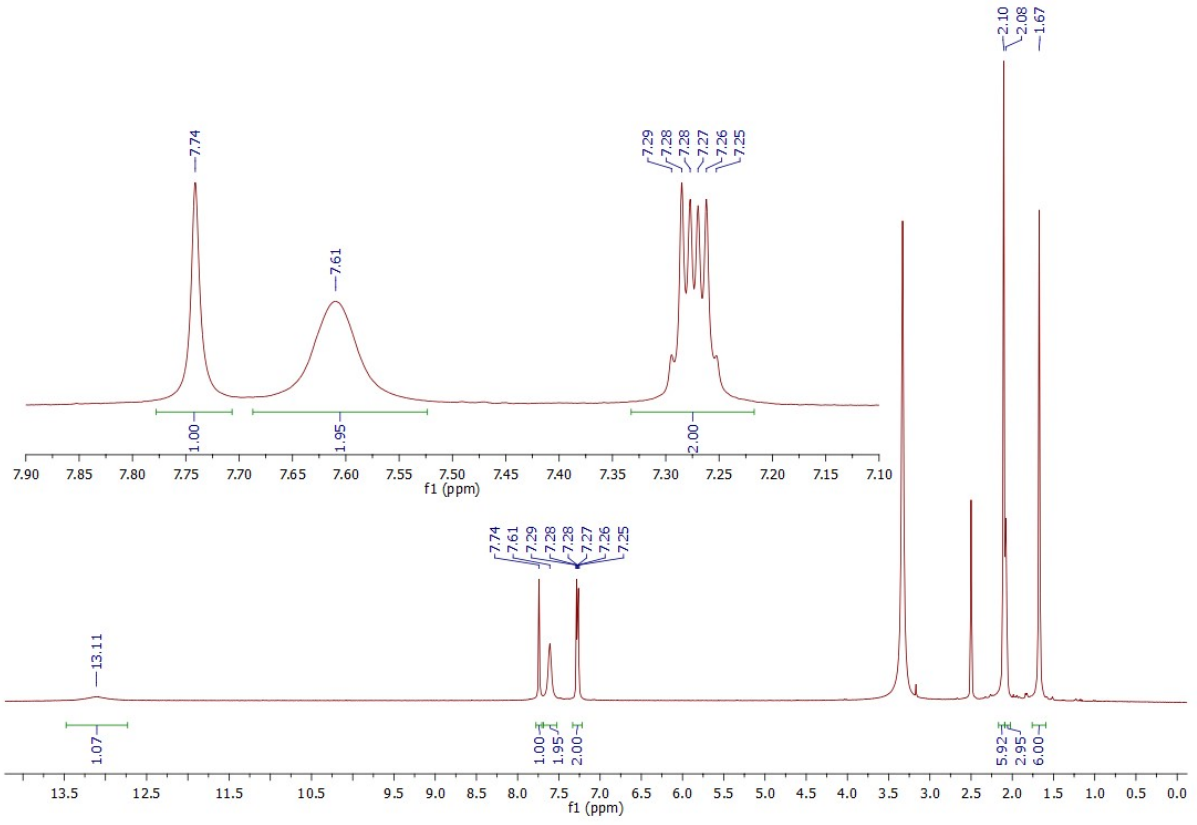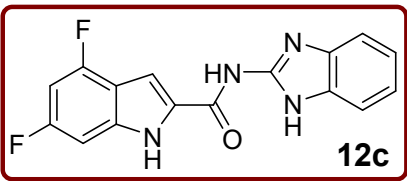

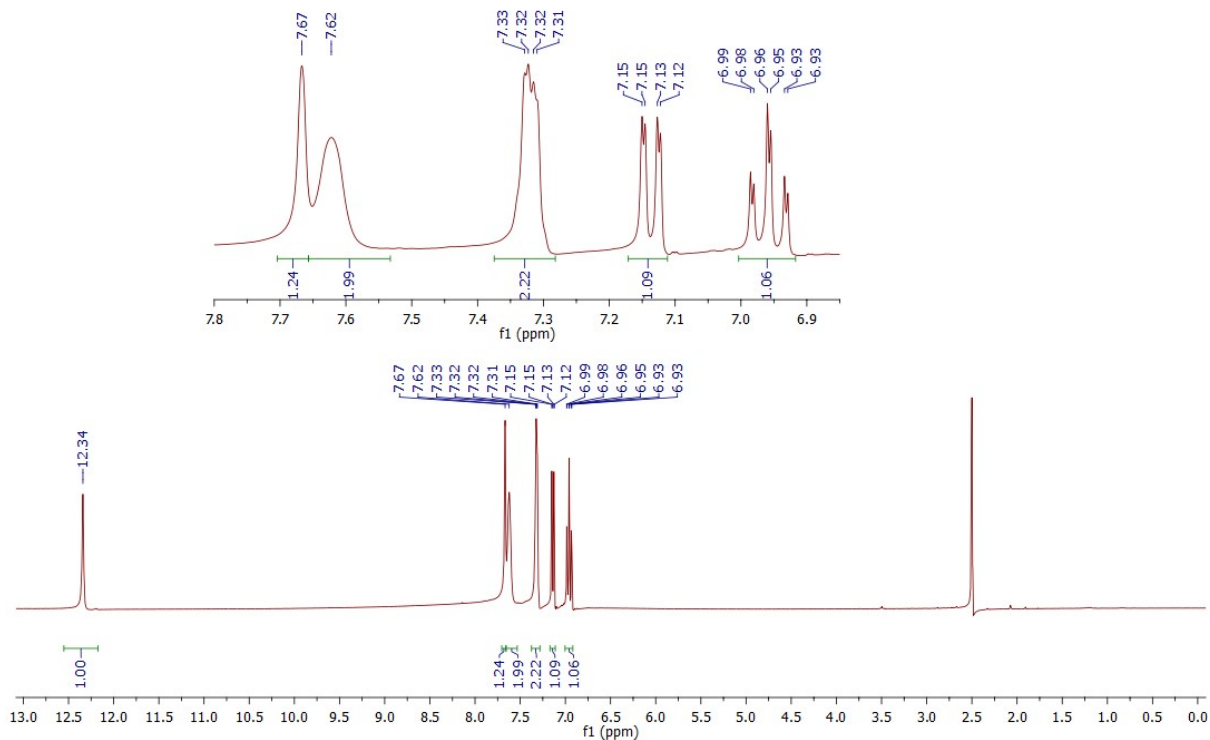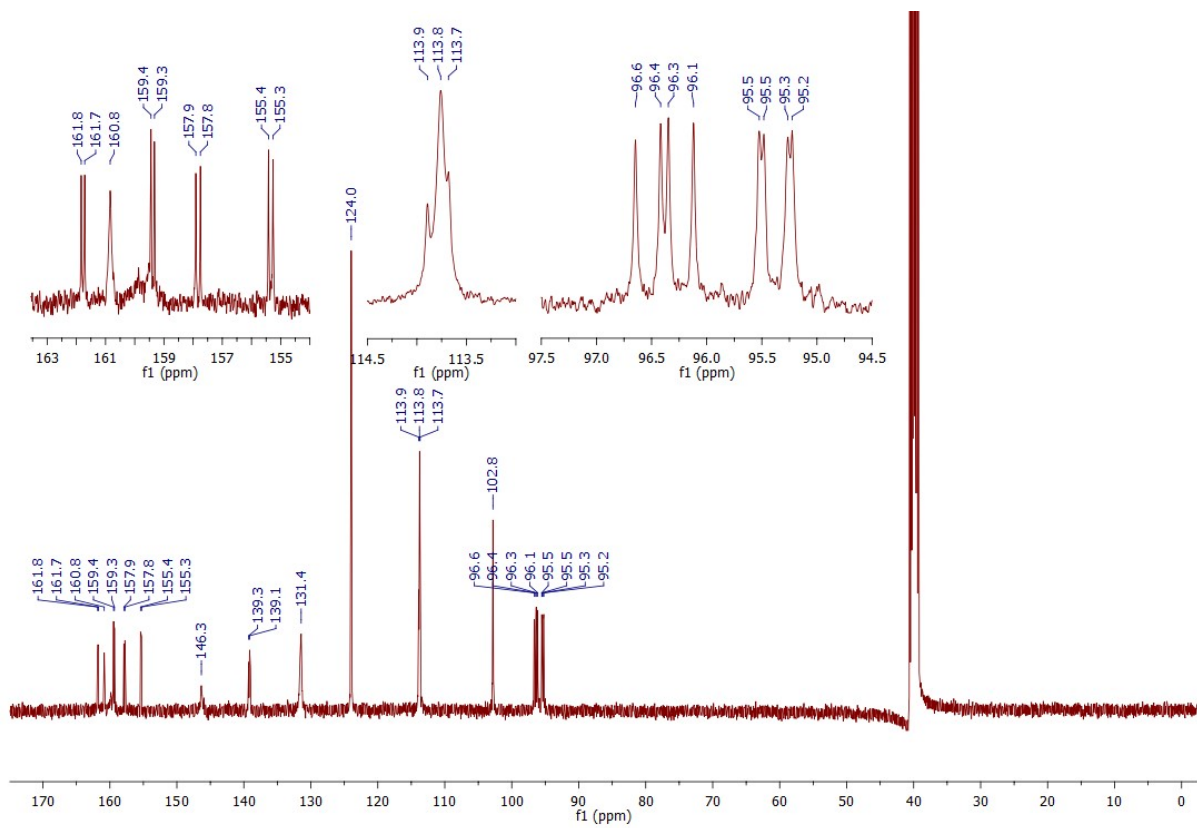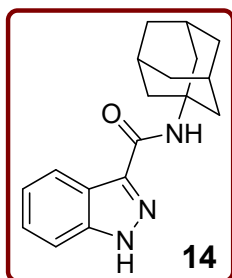

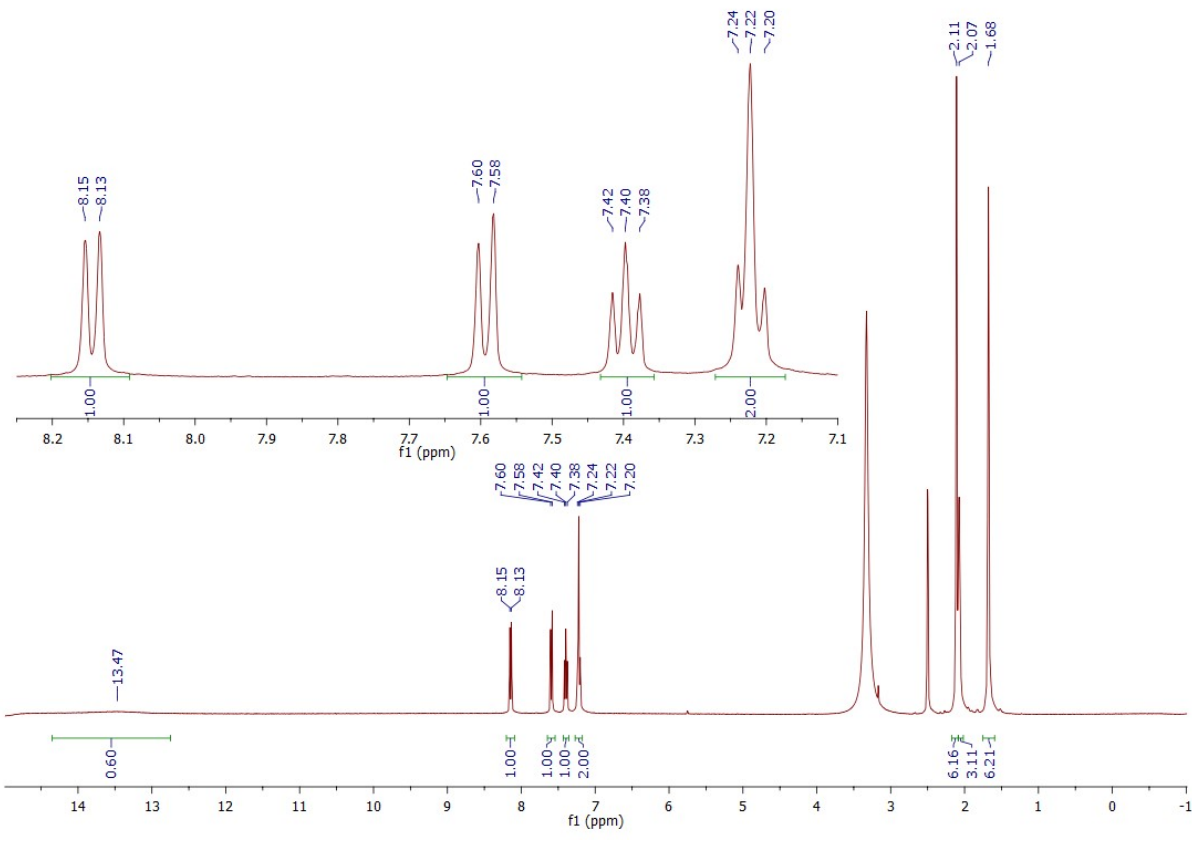

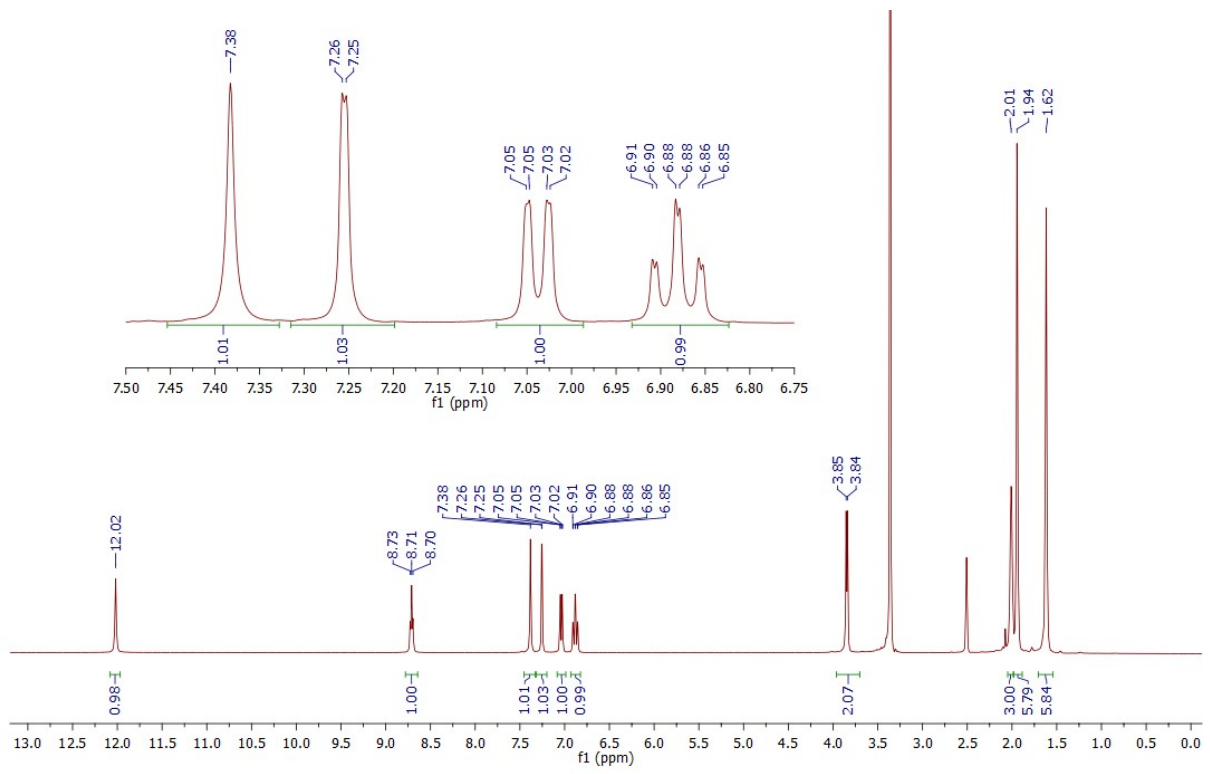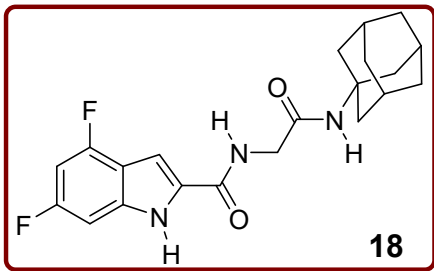

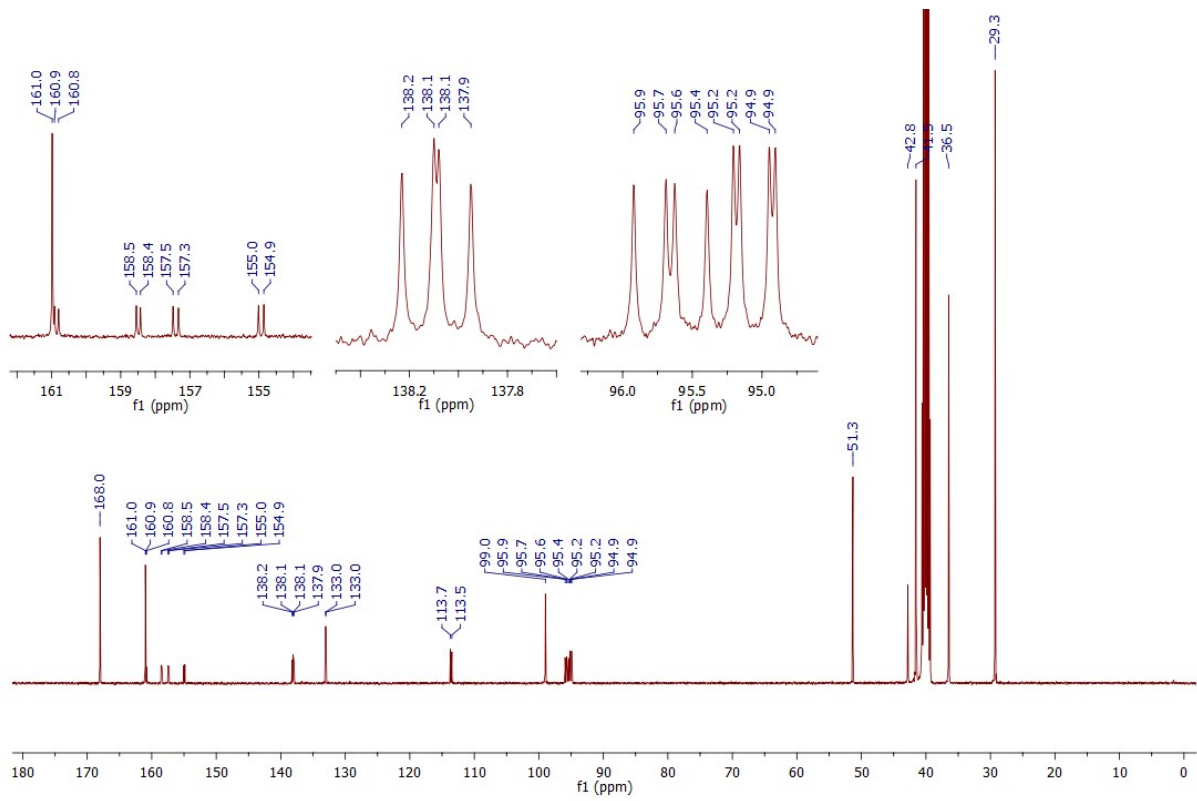

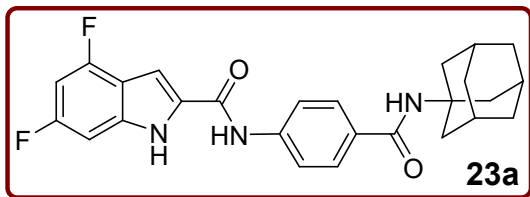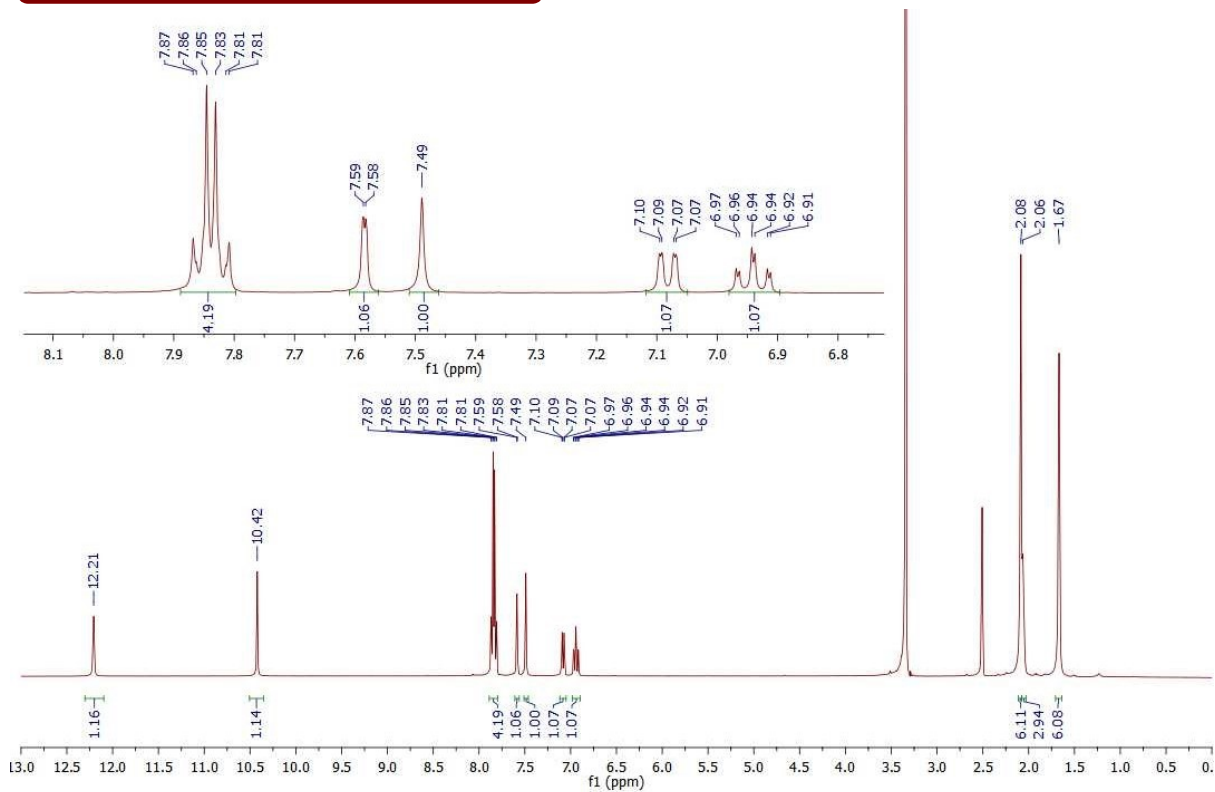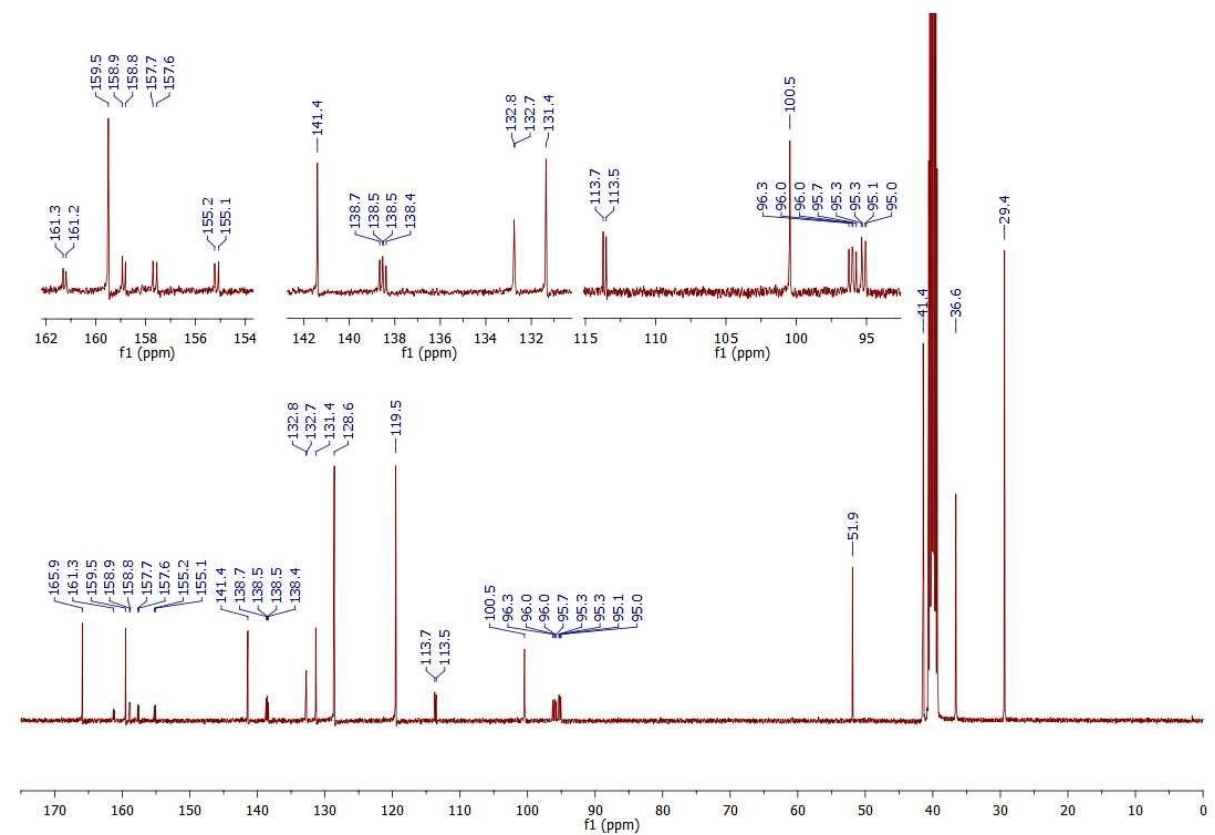

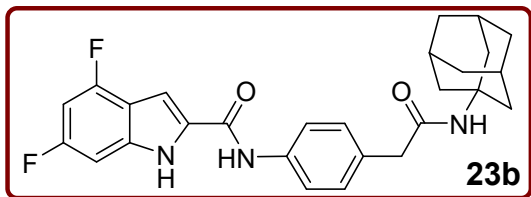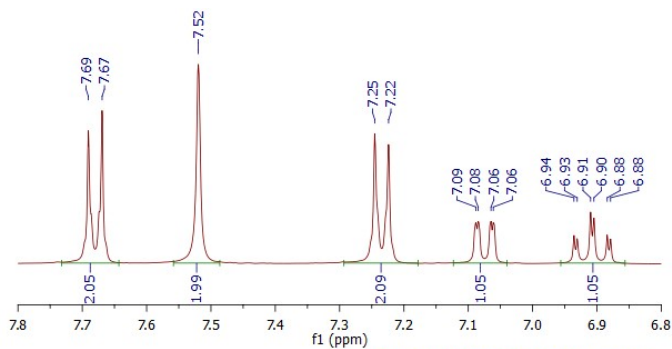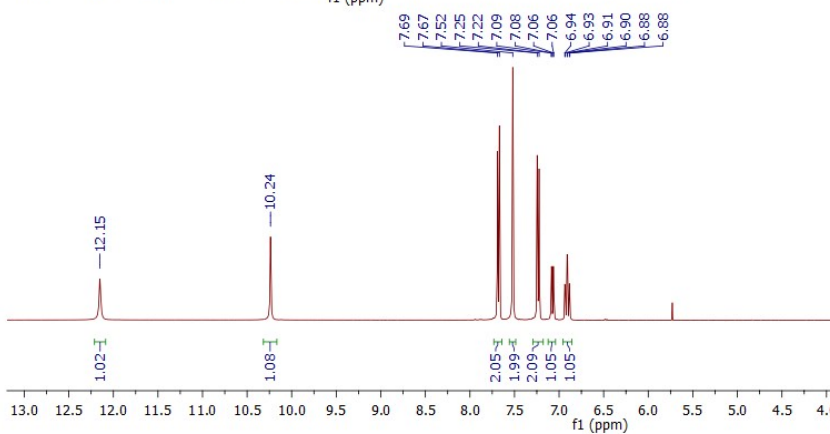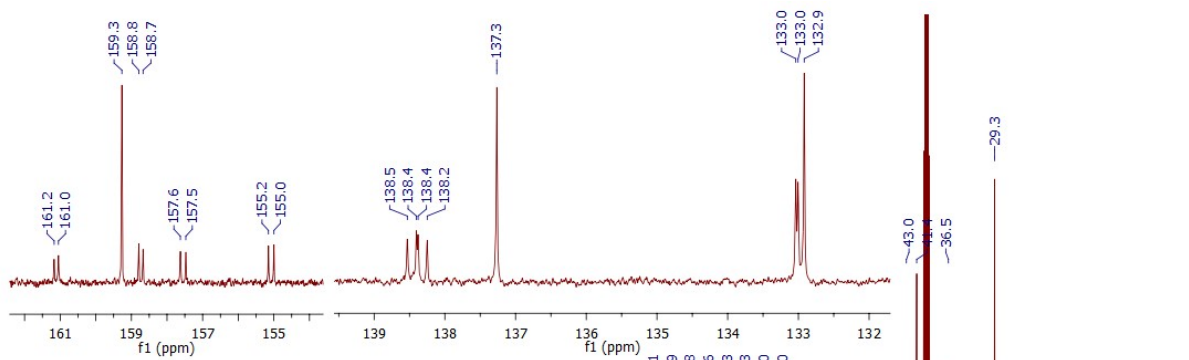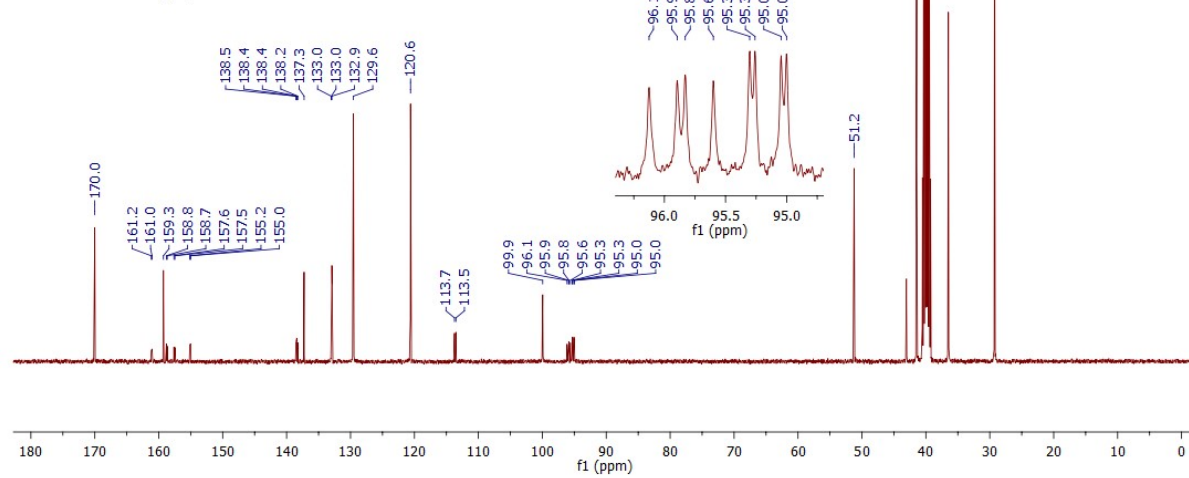

Supplement: MD-012-D1MD00065A-s001.pdf [file MD-012-D1MD00065A-s001.pdf]
